# Supplementary material for: Changes in aortic valve replacement procedures in Denmark from 2008 to 2020
Source: HighWire-hosted journal article supplement (doi:10.1136/heartjnl-2022-321594), 2022-12-05
Supplement: heartjnl-2022-321594supp001_data_supplement.pdf [file heartjnl-2022-321594supp001_data_supplement.pdf]

1    **Supplemental Materials**

2    **Supplementary Table 1: Overview of ICD-, Procedure, and ATC codes**

| Category               | Type      | Codes                                                                                                                                 |
|------------------------|-----------|---------------------------------------------------------------------------------------------------------------------------------------|
| Study population       |           |                                                                                                                                       |
| TAVI                   | NOMESCO † | KFMD11, KFMD12 & KFMD14<br><br><i>Transfemoral access:</i> KFMD14<br><br><i>Other access:</i> KFMD11, KFMD12                          |
| Surgical bioprostheses | NOMESCO   | KFMD10                                                                                                                                |
| Mechanical prostheses  | NOMESCO   | KFMD00                                                                                                                                |
| CABG (+ SAVR)          | NOMESCO   | KFNA.x*, KFNB.x, KFNC.x, KFND.x & KFNE.x (Combined with<br><br>Procedure codes from surgical bioprostheses and mechanical prostheses) |
| PCI (+TAVI)            | NOMESCO   | KFNG.x (Combined with Procedure codes from TAVI)                                                                                      |
| Exclusion Criteria     |           |                                                                                                                                       |
| Aortic Stenosis (AS)   | ICD-10    | I35.0, I35.2, I06.0 & I06.2                                                                                                           |
|                        | ICD-8     | 39500, 39502, 39590 & 3959                                                                                                            |

|                     |         |                        |
|---------------------|---------|------------------------|
| Prior AVR or Repair | NOMESCO | KFM.x, KFCA60 & KFCA70 |
|---------------------|---------|------------------------|

*To find isolated SAVR procedures patients with combined surgery were excluded*

|                                            |         |                                                                                                                                                                                         |
|--------------------------------------------|---------|-----------------------------------------------------------------------------------------------------------------------------------------------------------------------------------------|
| Combined surgery on <u>Mitral Valve</u>    | NOMESCO | KFK.x                                                                                                                                                                                   |
| Combined surgery on <u>Tricuspid valve</u> | NOMESCO | KFG.x                                                                                                                                                                                   |
| Combined surgery on <u>Pulmonary valve</u> | NOMESCO | KFJE.x & KFJF.x                                                                                                                                                                         |
| Combined surgery for arrhythmias           | NOMESCO | KFPB.x & KFPD.x                                                                                                                                                                         |
| Combined surgery other                     | NOMESCO | KFCA10, KFCA20, KFCA30, KFCA40, KFCA50, KFCA60, KFCA70, KFCA96, KFCB10, KFCB20, KFCB30, KFCB40, KFCB50, KFCB96, KFHA10, KFHA20, KFHA96, KFLD00, KFLD10, KFLD20, KFLE00, KFLE10 & KFLE20 |

**Comorbidities**

|                                        |                                                 |                                                                                                                                                                                                          |
|----------------------------------------|-------------------------------------------------|----------------------------------------------------------------------------------------------------------------------------------------------------------------------------------------------------------|
| Cardiac implantable electronic devices | Danish procedure codes for medical examinations | BFCA0, BFCB0                                                                                                                                                                                             |
| Diabetes                               | ICD-10                                          | E10.x to E14.x                                                                                                                                                                                           |
|                                        | ICD-8                                           | 250                                                                                                                                                                                                      |
| Dialysis (chronic)                     | Danish procedure codes for medical examinations | BJFD2                                                                                                                                                                                                    |
| Renal disease                          | ICD-10                                          | E10.2, E11.2, E13.2, E14.2<br><br>I12.0 I13.x<br><br>N02.x to N08.x, N11.x, N12.x, N14.x, N15.8, N15.9, N16.0, N16.2 to N16.4, N16.8, N18.x, N19.x, N26.x<br><br>Q61.2, Q61.3, Q61.5, Q61.9<br><br>Z99.2 |
|                                        | ICD-8                                           | 25002<br><br>403, 404, 40039<br><br>581, 582, 583, 584, 59009, 59320<br><br>75310, 75311, 75319                                                                                                          |
| Liver disease                          | ICD-10                                          | B15.x to B19.x, C22.x, D68.4C I98.2, K70.x to K77.0, Q61.8A, Z94.4                                                                                                                                       |

|                                  |        |                                                        |
|----------------------------------|--------|--------------------------------------------------------|
|                                  | ICD-8  | 070, 155, 571 to 573                                   |
| Atrial fibrillation/flutter      | ICD-10 | I48                                                    |
|                                  | ICD-8  | 42793, 42794                                           |
| Congestive heart failure         | ICD-10 | I09.9, I11.0, I13.0, I13.2, I42.x, I50.x, J81.9, I25.5 |
|                                  | ICD-8  | 425, 428, 4270, 4271                                   |
| Ischemic heart disease           | ICD-10 | I20.x to I25.x                                         |
|                                  | ICD-8  | 410 to 414                                             |
| Ischemic/haemorrhagic stroke     | ICD-10 | I60.x to I64.x                                         |
|                                  | ICD-8  | 430, 431, 432,433,434, 436                             |
| Peripheral Vascular Disease      | ICD-10 | I70.x & I74.x                                          |
| (PAD)                            | ICD-8  | 440, 440                                               |
| Chronic obstructive lung disease | ICD-10 | J42.x, J43.x, J44.x                                    |
|                                  | ICD-8  | 490, 491, 492                                          |
| Malignancy                       | ICD-10 | C00.x to C97.x (not in C44.x)                          |
|                                  | ICD-8  | 140 to 209 (not in 173)                                |

Medicine

|                             |     |                                                                                                  |
|-----------------------------|-----|--------------------------------------------------------------------------------------------------|
| Antihypertensive medication | ATC | C02A, C02B, C02C, C02DB, C02DD, C02DG, C03A, C03B, C03C, C03D, C03EB01 & C03EB02, C07, C08, C09, |
| Betablockade                | ATC | C07 & C09BX                                                                                      |
| Lipid Lowering medication   | ATC | C10                                                                                              |
| Anticoagulant Therapy       | ATC | B01AA, B01AE, B01AF                                                                              |
| Vitamin-K antagonists       |     |                                                                                                  |
| NOAC <sup>2</sup>           |     |                                                                                                  |
| Glucose Lowering medication | ATC | A1                                                                                               |

\*“.x” indicates every sub-classification of diagnosis code or ATC code

†The Nordic Medico-Statistical Committee. *Classification of surgical procedures*

<sup>2</sup>New Oral Anticoagulant

3

4

5    **Supplementary Table 2: ICD-10 Coding algorithms for Charlson Comorbidities**

| Comorbidities                     | Type   | Codes (Within the last 5 years from index date)                                                      |
|-----------------------------------|--------|------------------------------------------------------------------------------------------------------|
| <b>Charlson Comorbidity Index</b> |        |                                                                                                      |
| Myocardial infarction             | ICD-10 | I21.x*, I22.x, I125.2                                                                                |
| Congestive Heart Failure          | ICD-10 | I109.9, I11.0, I113.0, II3.2, I125.5, I142.0, I142.5-I142.9, I143.x, I50.x, P29.0                    |
| Peripheral vascular disease       | ICD-10 | I70.x, I71.x, I73.1, I73.8, I73.9, I77.1, I79.0, I79.2, K55.1, K55.8, K55.9, Z95.8, Z95.9            |
| Cerebrovascular disease           | ICD-10 | G45.x, G46.x, H34.0, I60.x-I69.x                                                                     |
| Dementia                          | ICD-10 | F00.x-F03.x, F05.1, G30.x, G31.1                                                                     |
| Chronic pulmonary disease         | ICD-10 | I27.8, I27.9, J40.x-J47.x, J60.x-J67.x, J68.4, J70.1, J70.3                                          |
| Rheumatic disease                 | ICD-10 | M05.x, M06.x, M31.5, M32.x-M34.x, M35.1, M35.3, M36.0                                                |
| Peptic ulcer disease              | ICD-10 | K25.x-K28.x                                                                                          |
| Mild liver disease                | ICD-10 | B18.x, K70.0-K70.3, K70.9, K71.3-K71.5, K71.7, K73.x, K74.x, K76.0, K76.2-K76.4, K76.8, K76.9, Z94.4 |
| Moderate to severe liver disease  | ICD-10 | I85.0, I85.9, I86.4, I98.2, K70.4, K71.1, K71.2, K72.9, K76.5-K76.7                                  |

|                                                                                            |        |                                                                                                                                                                                    |
|--------------------------------------------------------------------------------------------|--------|------------------------------------------------------------------------------------------------------------------------------------------------------------------------------------|
| Diabetes without complications                                                             | ICD-10 | E10.0, E10.1, E10.6, E10.8, E10,9, E11.0, E11.1, E11.6, E11.8, E11.9,<br>E12.0, 12.1, E12.6, E12.8, E12.9, E13.0, E13.1, E13.6, E13.8, E13.9, E14.0,<br>E14.1, E14.6, E14.8, E14.9 |
| Diabetes with chronic complication                                                         | ICD-10 | E10.2-E10.5, E10.7, E11.2-E11.5, E11.7, E12.2-E12.5, E12.7, E13.2-E13.5,<br>E13.7, E14.2-E14.5, E14.7                                                                              |
| Renal disease                                                                              | ICD-10 | I12.0, I13.1, N03.2-N03.7, N05.2, N05.7, N18.x, N19.x, N25.0, Z49.0,<br>Z49.2, Z94.0, Z99.2                                                                                        |
| Hemiplegia or paraplegia                                                                   | ICD-10 | G04.1, G11., G80.1, G80.2, G81.x, G82.x, G83.0-G83.4, G83.9                                                                                                                        |
| Any malignancy including lymphoma and<br>leukemia except malignant neoplasm of the<br>skin | ICD-10 | C00.x-C26.x, C30.x-C34.x, C37.x-C41.x, C43.x, C45.x-C58.x, C60.x-<br>C76.x, C81.x-C85.x, C88.x, C90.x-C97.x                                                                        |
| Metastatic solid tumor                                                                     | ICD-10 | C77.x-C80.x                                                                                                                                                                        |
| AIDS/HIV                                                                                   | ICD-10 | B20.x- B22.x, B24.x                                                                                                                                                                |

\*“.x” indicates every sub-classification of diagnosis code or ATC code

6

7

8

9    **Supplementary Table 3: Baseline Characteristics of SAVR combined with CABG.**

| SAVR + CABG                                                         |                    |                    |                    |          |
|---------------------------------------------------------------------|--------------------|--------------------|--------------------|----------|
|                                                                     | 2008-2011          | 2012-2015          | 2016-2020          | P-value* |
| Demographics                                                        |                    |                    |                    |          |
| Number of AVR                                                       | 1477               | 1315               | 938                | <0.001   |
| Age (years), median [25 <sup>th</sup> -75 <sup>th</sup> percentile] | 74.5 [68.7 - 79.0] | 74.7 [69.4 - 78.7] | 72.7 [67.3 - 76.5] | <0.001   |
| Age groups, n(%)                                                    |                    |                    |                    | <0.001   |
| <75                                                                 | 778 (52.7)         | 674 (51.3)         | 615 (65.6)         |          |
| ≥75                                                                 | 699 (47.3)         | 641 (48.7)         | 323 (34.4)         |          |
| Sex (Male), n(%)                                                    | 1056 (71.5)        | 1026 (78.0)        | 774 (82.5)         | <0.001   |
| Peri-hospital                                                       |                    |                    |                    |          |
| Length of stay (days), median[25th-75th percentile]                 | 10 [7 - 16]        | 9 [6 - 14]         | 7 [6 - 11]         | <0.001   |
| Implantation of pacemaker, n(%)                                     | 48 (3.3)           | 42 (3.2)           | 33 (3.5)           | 0.914    |
| History of cardiovascular disease, n(%)                             |                    |                    |                    |          |
| Atrial Fibrillation                                                 | 337 (22.8)         | 334 (25.4)         | 186 (19.8)         | 0.213    |
| CIED                                                                | 51 (3.5)           | 47 (3.6)           | 25 (2.7)           | 0.564    |
| Heart Failure                                                       | 339 (23.0)         | 259 (19.7)         | 146 (15.6)         | <0.001   |



|                                         |             |             |            |        |
|-----------------------------------------|-------------|-------------|------------|--------|
| IHD                                     | 1280 (86.7) | 1166 (88.7) | 825 (88.0) | 0.413  |
| Comorbidity, medical history of n(%)    |             |             |            |        |
| AKI                                     | 67 (4.5)    | 68 (5.2)    | 33 (3.5)   | 0.251  |
| Diabetes                                | 348 (23.6)  | 350 (26.6)  | 271 (28.9) | <0.001 |
| Cancer                                  | 180 (12.2)  | 199 (15.1)  | 140 (14.9) | 0.032  |
| CKD                                     | 86 (5.8)    | 69 (5.2)    | 50 (5.3)   | 0.840  |
| COPD                                    | 152 (10.3)  | 117 (8.9)   | 76 (8.1)   | 0.087  |
| Dialysis                                | 27 (1.8)    | 21 (1.6)    | 10 (1.1)   | 0.289  |
| Hypertension                            | 975 (66.0)  | 897 (68.2)  | 535 (57.0) | <0.001 |
| PAD                                     | 138 (9.3)   | 124 (9.4)   | 63 (6.7)   | 0.055  |
| Prior Stroke / TIA                      | 177 (12.0)  | 164 (12.5)  | 106 (11.3) | 0.644  |
| Charlson Comorbidity Index, n(%)        |             |             |            | 0.019  |
| Charlson: 0                             | 651 (44.1)  | 596 (45.3)  | 481 (51.3) |        |
| Charlson: 1-2                           | 601 (40.7)  | 528 (40.2)  | 363 (38.7) |        |
| Charlson: ≥ 3                           | 225 (15.2)  | 191 (14.5)  | 94 (10.0)  |        |
| Prehospital medication (<6 month), n(%) |             |             |            |        |
| Anticoagulant treatment                 | 215 (14.6)  | 216 (16.4)  | 143 (15.2) | 0.434  |
| Beta-blocker                            | 781 (52.9)  | 632 (48.1)  | 346 (36.9) | <0.001 |

|                           |             |            |            |                  |
|---------------------------|-------------|------------|------------|------------------|
| Lipid-lowering medication | 1123 (76.0) | 989 (75.2) | 744 (79.3) | 0.086            |
| RAS inhibition            | 752 (50.9)  | 764 (58.1) | 551 (58.7) | <b>&lt;0.001</b> |

**\*All P-values were test of trend by each calendar year**

Abbreviations: Cardiac Implantable Electronic Devices (CIED), Ischemic Heart Disease (IHD), Chronic Kidney Disease (CKD), Chronic Obstructive Pulmonary Disease (COPD), Peripheral Artery Disease (PAD), Transient Ischemic Attack (TIA)

11    **Supplementary Figure 1: Annual proportion of isolated AVRs without revascularization (CABG or PCI)**

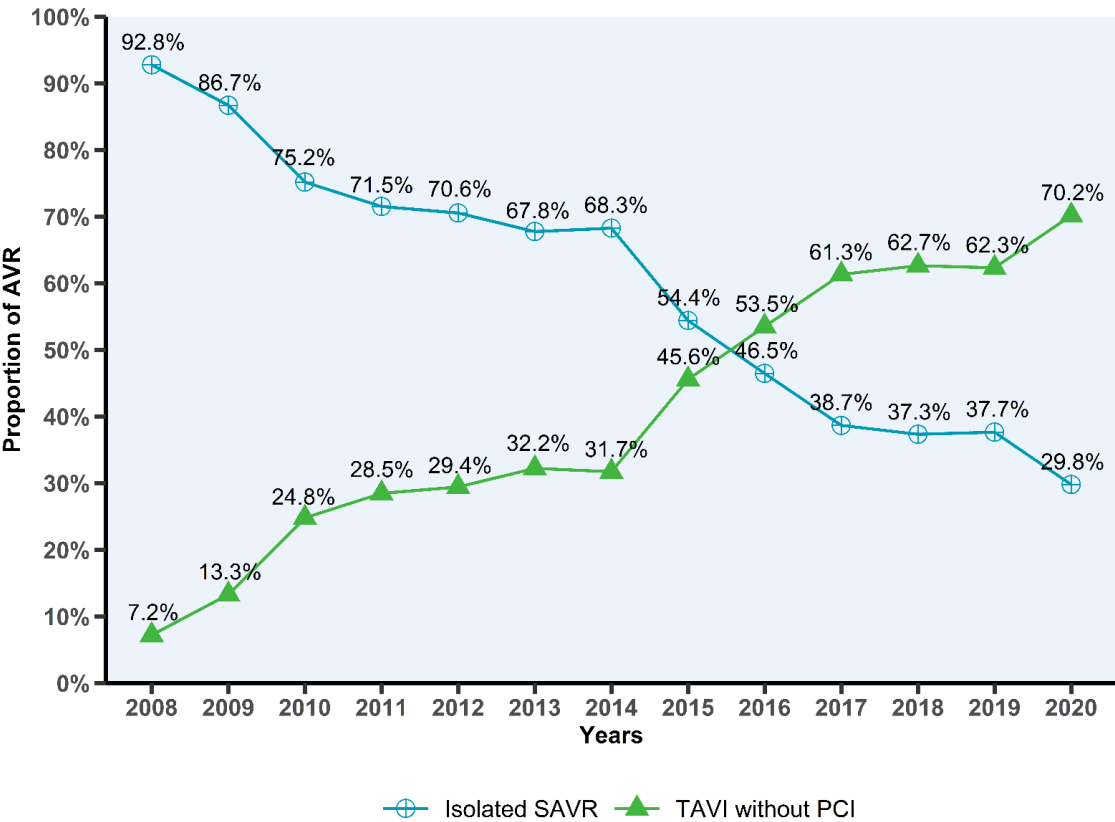

12

13    Legend: The proportion of isolated AVR procedures without any type of revascularization procedure (CABG or PCI), isolated SAVR in

14    **light blue** and TAVI without PCI in **green**. AVR=aortic valve replacement, SAVR = surgical aortic valve replacement, TAVI =

15    transcatheter aortic valve implantation.

16     **Supplementary Figure 2: Annual proportion of AVRs combined with revascularization (CABG or PCI)**

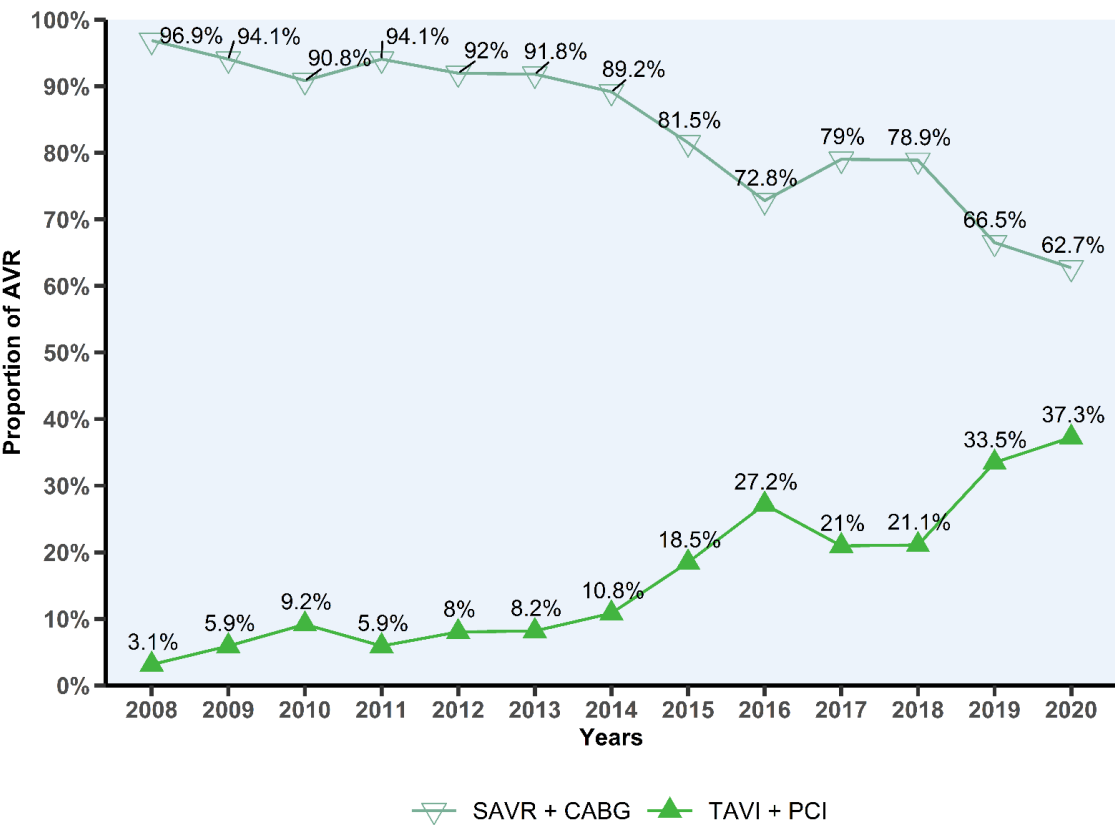

17

18     Legend: Proportion of SAVR combined with CABG (same date as SAVR) and TAVI with PCI (within 90 days before TAVI) out of all

19     AVR procedures combined with a revascularization procedure. SAVR + CABG in **dim green** and TAVI + PCI in **green**. AVR=aortic

20     valve replacement, CABG = coronary artery bypass grafting, PCI = percutaneous coronary intervention, SAVR = surgical aortic valve

21     replacement, TAVI = transcatheter aortic valve implantation.

22

23

24    **Supplementary Figure 3: Annual proportion of TAVI access sites**

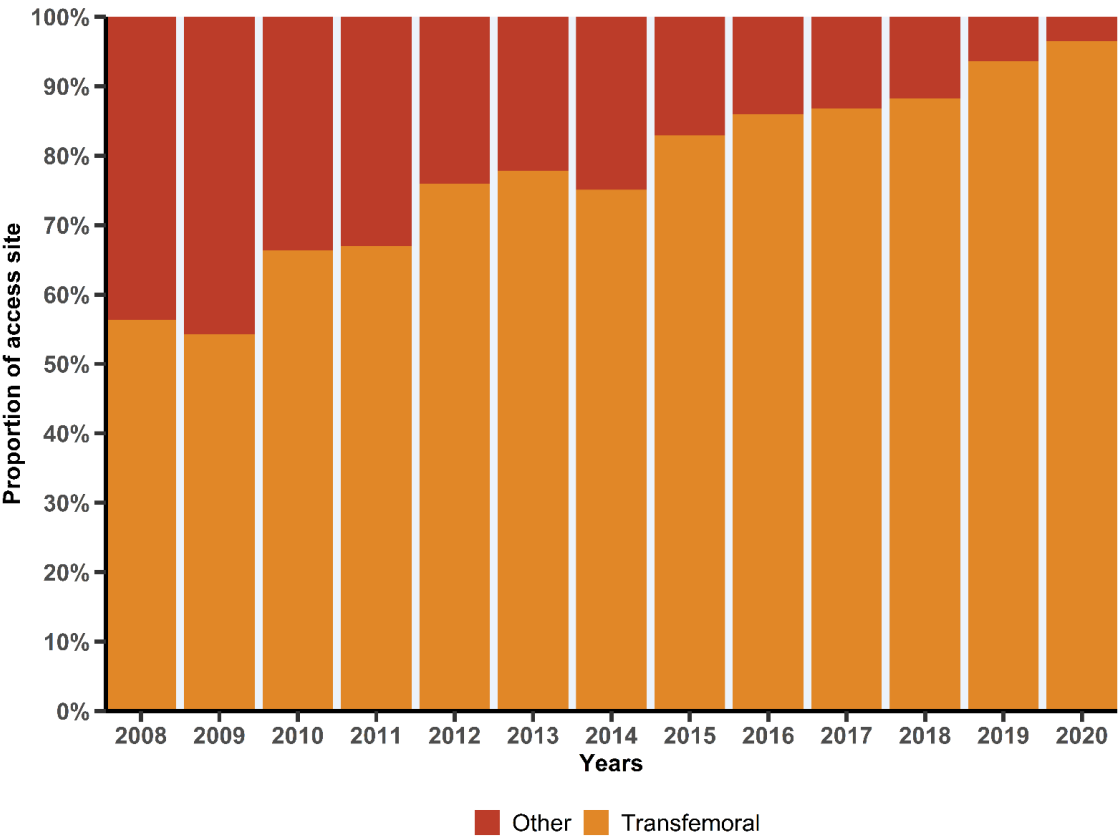

25

26    Legend: Annual proportion of TAVI access sites out of total number of TAVI procedures. Other access types in **red** and transfemoral  
27    access in **orange**. TAVI = transcatheter aortic valve implantation.

28 **Supplementary Figure 4: The proportion of isolated AVRs according to age in four age**  
29 **categories**

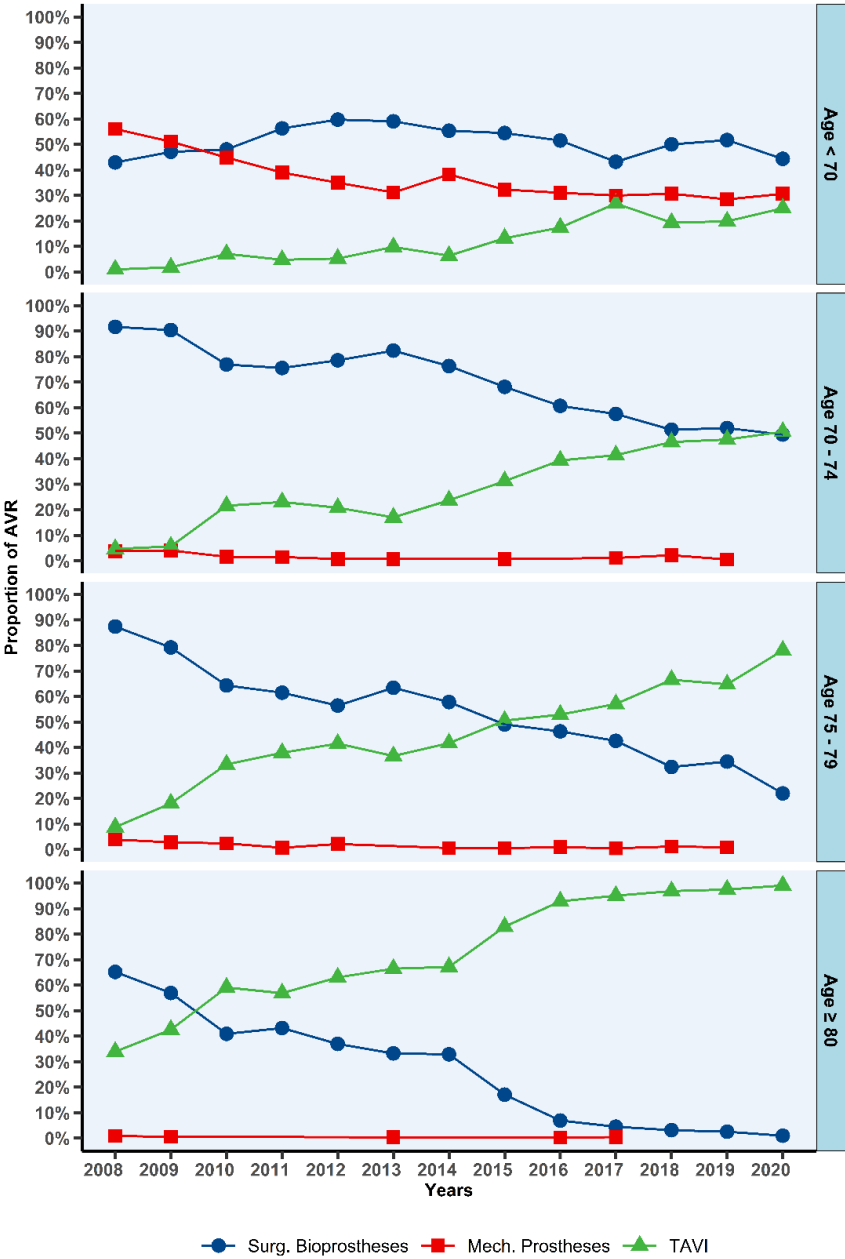

30  
31 Legend: Annual proportion of surgical bioprostheses, mechanical prostheses, and TAVI according  
32 to age in four age categories: <70, 70-74, 75-79 and ≥80 years of age. Surgical bioprostheses in  
33 **blue**, mechanical prostheses in **red**, and TAVI in **green**. AVR=aortic valve replacement, TAVI =  
34 transcatheter aortic valve implantation.
